# Supplementary material for: In situ meat spoilage monitoring via label-free recognition of ethylenediamine using a flexible paper-based electrochemical sensor
Source: Royal Society of Chemistry journal article supplement (doi:10.1039/d6ra00092d), 2026-04-29
Supplement: d6ra00092d1.pdf [file d6ra00092d1.pdf]

## Supporting Information

### ***In-situ* meat spoilage monitoring using label-free recognition of ethylenediamine by flexible paper based electrochemical sensor**

Rokhsareh Ebrahimi <sup>a</sup>, Houman Kholafazad kordasht <sup>b</sup>, Mohammad Hasanzadeh <sup>c,\*</sup>, Nasrin Shadjou <sup>d</sup>

<sup>a</sup> Asian Nano-ink (ANI) Company, Tabriz University of Medical Sciences, Tabriz, Iran.

<sup>b</sup> Nutrition Research Center, Tabriz University of Medical Sciences, Tabriz, Iran.

<sup>c</sup> Pharmaceutical Analysis Research Center, Tabriz University of Medical Sciences, Tabriz, Iran.

<sup>d</sup> Department of Nanotechnology, Faculty of Chemistry, Urmia University, Urmia, Iran.

\* Corresponding Authors:

**Mohammad Hasanzadeh**

Pharmaceutical Analysis Research Center, Tabriz University of Medical Sciences, Tabriz, Iran.

(\*) [hasanzadehm@tbzmed.ac.ir](mailto:hasanzadehm@tbzmed.ac.ir)

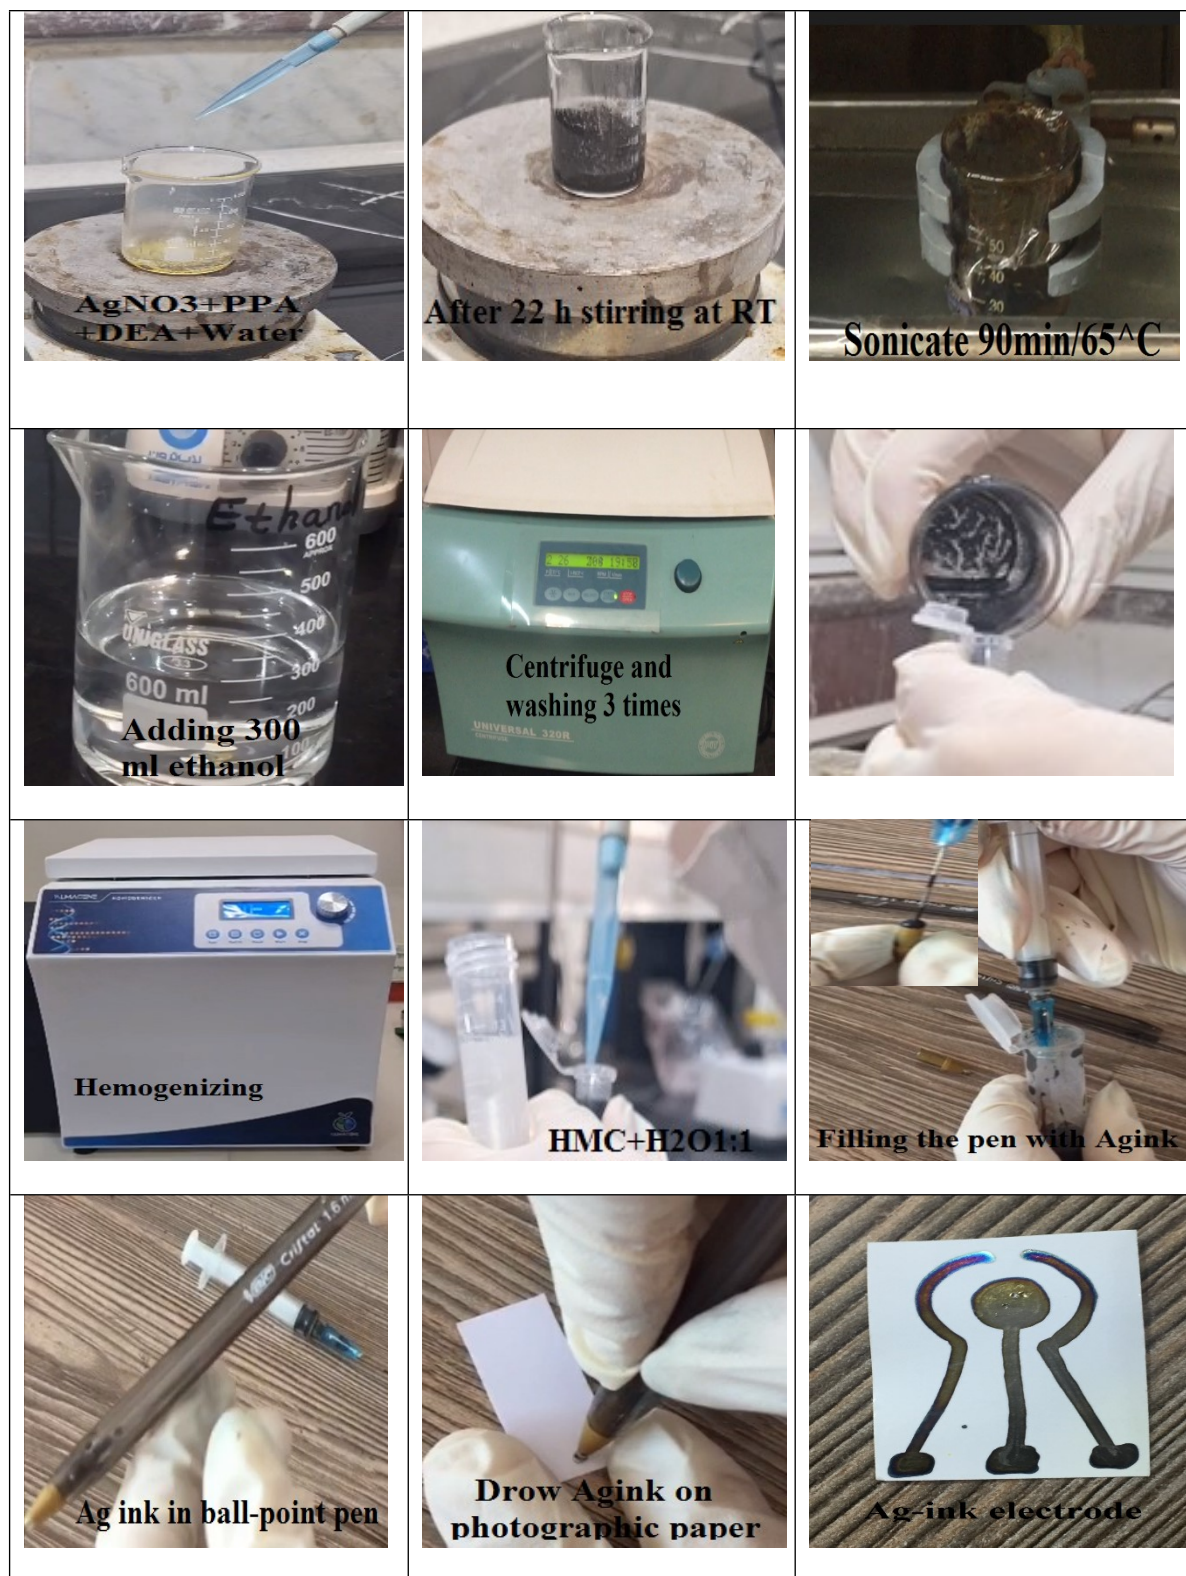

**Figure S1.** Photographic images of Ag nano-ink preparation procedure.

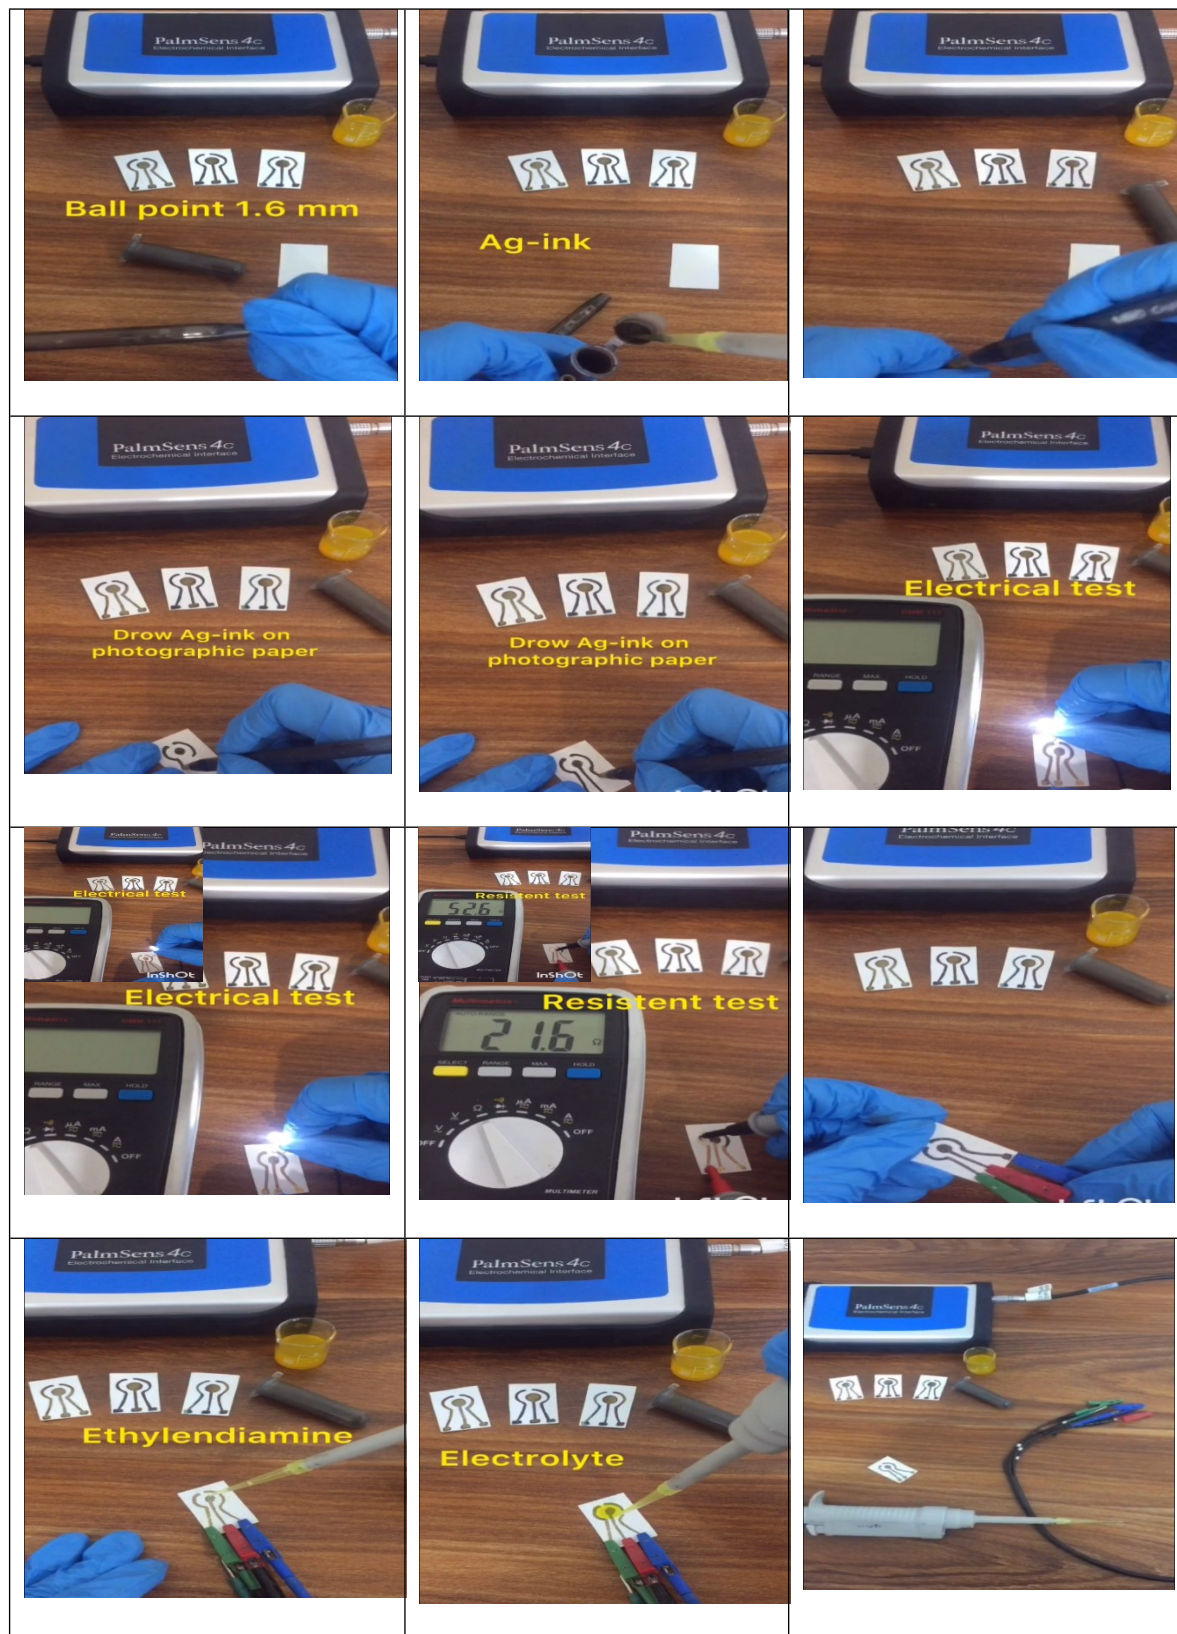

Figure S2. ED A analysis using photographic paper-based sensor.

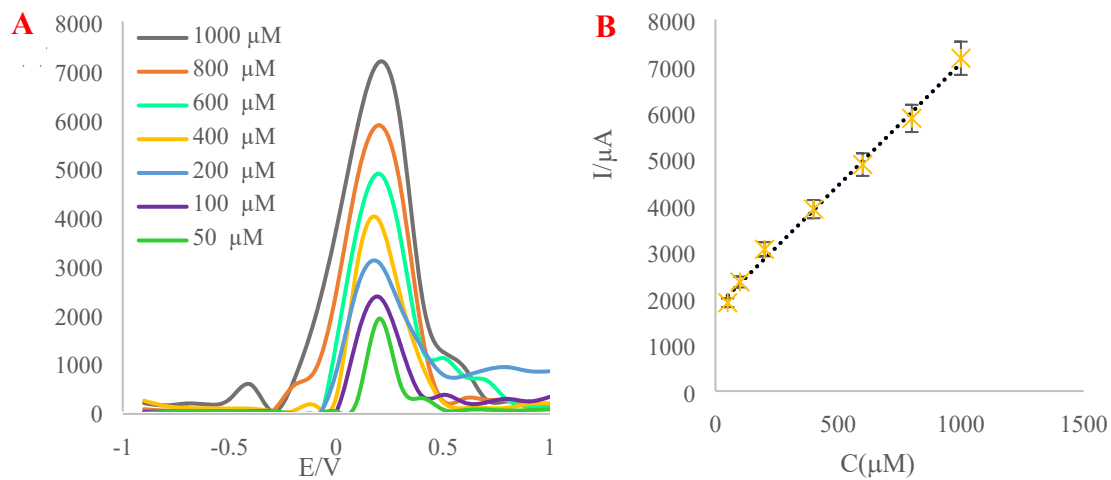

**Figure S3. (A)** SWVs of the developed electrochemical sensor in different concentrations of EDA (50, 100, 200, 400, 600, 800 and 1000  $\mu\text{M}$ ). **(B)** Calibration curves.

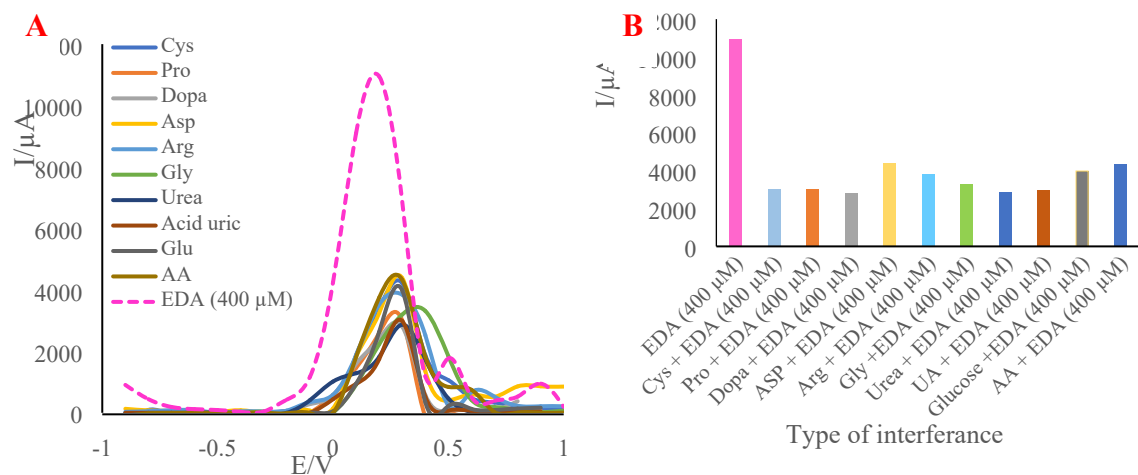

**Figure S4. (A)** SWVs of the prepared paper-based electrochemical sensor in the presence of different interferences (Glucose, Cys, AA, DA, UA, Pro, Asp, Arg, Gly and Urea). **(B)** Histogram of peak currents *versus* type of interferes agent.

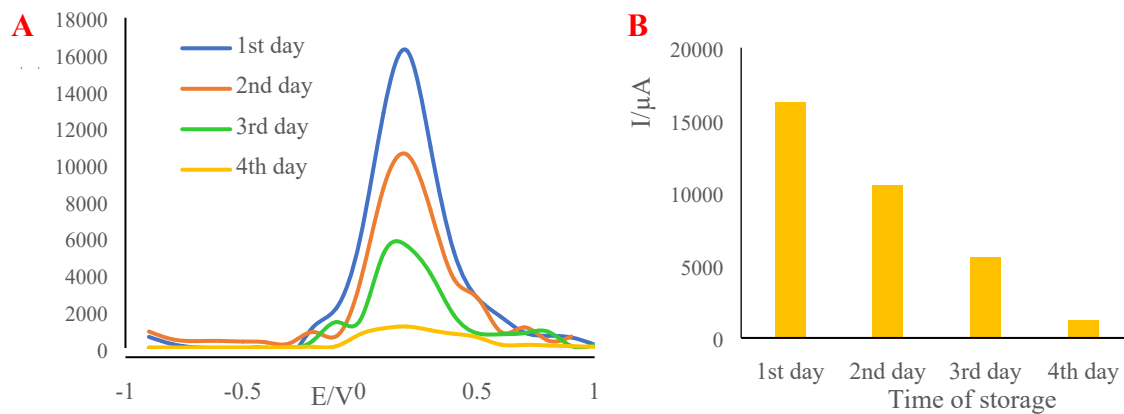

**Figure S5.** (A) SWVs of paper-based electrochemical sensor over four days. (B) Histogram of peak current *versus* time of sensor incubation in dark place.

**Table S1.** Comparison of peak current and potential of different interventions.

| Type of Technique | Ag nano-ink |      | Ag Ink/EDA |      |
|-------------------|-------------|------|------------|------|
|                   | I/ $\mu$ A  | E/V  | I/ $\mu$ A | E/V  |
| CV                | 852         | 0.35 | 9724       | 0.33 |
| SWV               | 10128.11    | 0.2  | 22252.57   | 0.2  |
| DPV               | 44.56       | 0.1  | 75.69      | 0.1  |

**Table S2.** Comparison of peak current and potential of different interventions.

| Type of species             | E/V | I/ $\mu$ A |
|-----------------------------|-----|------------|
| EDA (400 $\mu$ M)           | 0.2 | 10949.48   |
| Cys + EDA (400 $\mu$ M)     | 0.3 | 3005.485   |
| Pro + EDA (400 $\mu$ M)     |     | 3005.485   |
| DA + EDA (400 $\mu$ M)      |     | 2804.046   |
| ASP + EDA (400 $\mu$ M)     |     | 4384.908   |
| Arg + EDA (400 $\mu$ M)     |     | 3842.747   |
| Gly + EDA (400 $\mu$ M)     | 0.4 | 3314.263   |
| Urea + EDA (400 $\mu$ M)    | 0.3 | 2869.172   |
| UA + EDA (400 $\mu$ M)      |     | 2984.347   |
| Glucose + EDA (400 $\mu$ M) |     | 3978.43    |
| AA + EDA (400 $\mu$ M)      |     | 4323.652   |

**Table S3.** Comparison of current intensity and RSD of three microsensors in three different concentrations.

| No. of test     | Concentration of EDA               |                   |                    |                   |
|-----------------|------------------------------------|-------------------|--------------------|-------------------|
|                 | 100 $\mu\text{M}$                  | 400 $\mu\text{M}$ | 1000 $\mu\text{M}$ |                   |
|                 | <b>I/ <math>\mu\text{A}</math></b> |                   |                    |                   |
| 1 <sup>st</sup> | 11537.1                            | 14413.79          | 23916.03           |                   |
| 2 <sup>nd</sup> | 4132.597                           | 4537.099          | 16991.71           |                   |
| 3 <sup>rd</sup> | 212.4389                           | 781.6105          | 1939.09            |                   |
| RSD%            | 7.33                               | 7.89              | 4.45               | 6.56<br>(Average) |

**Table S4.** Comparison of current intensity and RSD of three paper-based electrochemical sensors in three different concentrations.

| No. of test     | Concentration of EDA               |                   |                    |                   |
|-----------------|------------------------------------|-------------------|--------------------|-------------------|
|                 | 100 $\mu\text{M}$                  | 400 $\mu\text{M}$ | 1000 $\mu\text{M}$ |                   |
|                 | <b>I/ <math>\mu\text{A}</math></b> |                   |                    |                   |
| 1 <sup>st</sup> | 11537.1                            | 14413.79          | 25828.84           |                   |
| 2 <sup>nd</sup> | 10275.33                           | 16165.17          | 23916.03           |                   |
| 3 <sup>rd</sup> | 11043.45                           | 16815.92          | 22175.78           |                   |
| RSD%            | 4.13                               | 3.82              | 3.64               | 3.86<br>(Average) |
